# Supplementary material for: Reducing the Periplasmic Glutathione Content Makes Escherichia coli Resistant to Trimethoprim and Other Antimicrobial Drugs
Source: PubMed Central journal article supplement (PMC8672908; doi:10.1128/spectrum.00743-21), 2021-12-15
Supplement: spectrum00743-21_supp_1_seq4.pdf [file spectrum00743-21_supp_1_seq4.pdf]

## Supplemental Materials

1 **FILE S1** Quantification of intracellular TMP via LC-MS.

2 TMP analysis was detected using an HPLC system (Ultimate 3000 HPLC, Thermo Fisher,  
3 CA, USA) coupled to an AB Sciex 4500 triple-quadruple mass spectrometer (LC-MS/MS).  
4 Samples were filtered and centrifuged at 10,000 g for 5 min, and these supernatants were  
5 further diluted with purified water (1:1, v/v). The injector temperature was set to 20°C, and  
6 the column was maintained at 40°C. The separation was performed on a column Synchronis  
7 C18 (1.7 µm, 2.1 mm × 100 mm, Thermo Fisher) after injection of a 5 µL sample aliquot.  
8 The gradient elution, with 0.1% (v/v) formic acid in methanol (A) and 0.1% (v/v) formic  
9 acid in water (B) at a flow rate of 0.3 mL/min, was optimized as follows: 0–5 min (90–30%  
10 B), hold for 3 min (30% B), 8.01 min (90% B), and equilibrate for 2 min (90% B). The  
11 MS/MS was operated in the multiple reaction monitoring (MRM) mode. The LC-MS/MS  
12 parameters of TMP are provided in Table S8. The retention time of TMP was 5.32 min.  
13 Quantification was conducted using a standard calibration curve consisting of a  
14 concentration gradient (0.1, 0.2, 0.5, 1.0, 2.0, 5.0, and 10 ng mL<sup>-1</sup>) with the deviation of  
15 every point from the regression line being less than 20% from that of its theoretical value.  
16 The regression coefficients ( $r^2$ ) of the calibration curve for the target analyte were higher  
17 than 0.99. The TMP concentration was finally normalized to the OD600, the reading of  
18 which was taken from the original bacterial culture.

19

20 **TABLE S1** TMP MICs in Enterohemorrhagic *E. coli* (EHEC) and *E. coli* BW25113 and  
 21 MG1655 strains.

| Strains                                         | MIC for TMP ( $\mu\text{g}/\text{mL}$ ) | Fold change |
|-------------------------------------------------|-----------------------------------------|-------------|
| EHEC O157:H7                                    | 0.64                                    | —           |
| EHEC O157:H7:: <i>Kan</i>                       | 0.64                                    | —           |
| EHEC O157:H7 $\Delta$ <i>gshA</i> :: <i>Kan</i> | 2.56                                    | 4           |
| EHEC O157:H7 $\Delta$ <i>gshB</i> :: <i>Kan</i> | 2.56                                    | 4           |
| EHEC O157:H7 $\Delta$ <i>grxA</i>               | 1.28                                    | 2           |
| EHEC O157:H7 $\Delta$ <i>cydD</i> :: <i>Kan</i> | 5.12                                    | 8           |
| <i>E. coli</i> ATCC 25922                       | 2.56                                    | —           |
| <i>E. coli</i> ATCC 25922 $\Delta$ <i>gshA</i>  | 20.48                                   | 8           |
| <i>E. coli</i> ATCC 25922 $\Delta$ <i>gshB</i>  | 10.24                                   | 4           |
| <i>E. coli</i> ATCC 25922 $\Delta$ <i>grxA</i>  | 5.12                                    | 2           |
| <i>E. coli</i> ATCC 25922 $\Delta$ <i>cydD</i>  | 10.24                                   | 4           |
| <i>E. coli</i> BW25113                          | 0.32                                    | —           |
| <i>E. coli</i> BW25113 $\Delta$ <i>gshA</i>     | 1.28                                    | 4           |
| <i>E. coli</i> BW25113 $\Delta$ <i>gshB</i>     | 1.28                                    | 4           |
| <i>E. coli</i> BW25113 $\Delta$ <i>grxA</i>     | 0.64                                    | 2           |
| <i>E. coli</i> BW25113 $\Delta$ <i>cydD</i>     | 1.28                                    | 4           |
| <i>E. coli</i> MG1655                           | 0.32                                    | —           |
| <i>E. coli</i> MG1655 $\Delta$ <i>gshA</i>      | 1.28                                    | 4           |
| <i>E. coli</i> MG1655 $\Delta$ <i>gshB</i>      | 1.28                                    | 4           |
| <i>E. coli</i> MG1655 $\Delta$ <i>grxA</i>      | 0.32                                    | —           |
| <i>E. coli</i> MG1655 $\Delta$ <i>cydD</i>      | 1.28                                    | 4           |

22

23

24 **TABLE S2** Susceptibilities of *E. coli* W3110  $\Delta$ *cydD* and complement strain to multiple  
 25 antimicrobial drugs with different IPTG concentration.

| Strains                                                           | IPTG( $\mu$ m) | MIC <sup>a</sup> ( $\mu$ g/mL) of |    |     |     |     |    |    |     |
|-------------------------------------------------------------------|----------------|-----------------------------------|----|-----|-----|-----|----|----|-----|
|                                                                   |                | TMP                               | K  | Neo | Gen | Spe | SM | Cm | RIF |
| <i>E. coli</i> W3110                                              |                | 0.32                              | 5  | 5   | 2   | 20  | 8  | 5  | 8   |
| <i>E. coli</i> W3110 $\Delta$ <i>cydD</i>                         | 0              | 1.28                              | 40 | 40  | 16  | 40  | 32 | 10 | 16  |
| <i>E. coli</i> W3110 $\Delta$ <i>cydD</i><br>pCA24N:: <i>cydD</i> |                | 0.32                              | 10 | 10  | 8   | 40  | 16 | —  | 16  |
| <i>E. coli</i> W3110                                              |                | 0.32                              | 5  | 5   | 2   | 20  | 8  | 5  | 8   |
| <i>E. coli</i> W3110 $\Delta$ <i>cydD</i>                         | 2.5            | 1.28                              | 40 | 40  | 16  | 40  | 32 | 10 | 16  |
| <i>E. coli</i> W3110 $\Delta$ <i>cydD</i><br>pCA24N:: <i>cydD</i> |                | 0.32                              | 10 | 10  | 8   | 40  | 16 | —  | 16  |
| <i>E. coli</i> W3110                                              |                | 0.32                              | 5  | 5   | 2   | 20  | 8  | 5  | 8   |
| <i>E. coli</i> W3110 $\Delta$ <i>cydD</i>                         | 5              | 1.28                              | 40 | 40  | 16  | 40  | 32 | 10 | 16  |
| <i>E. coli</i> W3110 $\Delta$ <i>cydD</i><br>pCA24N:: <i>cydD</i> |                | 0.32                              | 20 | 20  | 8   | 40  | 16 | —  | 16  |

26 <sup>a</sup>TMP, trimethoprim; K, kanamycin; Neo, neomycin; Gen, gentamicin; Spe,  
 27 spectinomycin; SM, streptomycin; Cm, chloramphenicol; RIF, rifampin.

28

29 **TABLE S3** Comparative analysis for target gene mutations in NCBI pathogen list.

30

31 **TABLE S4** GSH content in *E. coli* W3110,  $\Delta grxA$ ,  $\Delta cydD$ , and  $\Delta gshA$ .

| Strains                            | GSH <sub>in</sub> ( $\mu\text{m}/\text{OD}_{600}$ ) | GSH <sub>per</sub> ( $\mu\text{m}/\text{OD}_{600}$ ) |
|------------------------------------|-----------------------------------------------------|------------------------------------------------------|
| <i>E. coli</i> W3110               | 24.32 $\pm$ 0.81 (1.0)                              | 9.98 $\pm$ 0.44 (1.0)                                |
| <i>E. coli</i> W3110 $\Delta grxA$ | 26.49 $\pm$ 0.89 (1.09)                             | 3.98 $\pm$ 0.52 (0.4)                                |
| <i>E. coli</i> W3110 $\Delta cydD$ | 23.00 $\pm$ 0.98 (0.95)                             | 6.31 $\pm$ 0.80 (0.63)                               |
| <i>E. coli</i> W3110 $\Delta gshA$ | 0                                                   | 0                                                    |

32 Data are presented the mean  $\pm$  SD and set as the ratio between the values in mutants and wild-  
 33 type strain in parentheses.

34

35

36

37 **TABLE S5** The effects of exogenous GSH treatments on TMP sensitivity in different  
 38 strains.

| Strains                            | MIC for TMP (mg/L) |          |
|------------------------------------|--------------------|----------|
|                                    | No addition        | 2 mM GSH |
| <i>E. coli</i> W3110               | 0.32               | 0.32     |
| <i>E. coli</i> W3110 $\Delta cydD$ | 1.28               | 0.32     |
| <i>E. coli</i> W3110 $\Delta grxA$ | 1.28               | 0.64     |
| <i>E. coli</i> W3110 $\Delta gshA$ | 1.28               | 0.64     |
| <i>E. coli</i> W3110 $\Delta gshB$ | 1.28               | 0.64     |

39

40 **TABLE S6** The gene expression levels of *acrAB*, *tolC*, and *soxS* in different strains.

| Strains                                                        | <i>acrA</i> <sup>a</sup> |                | <i>acrB</i>     |                | <i>tolC</i>     |                | <i>soxS</i>     |                |
|----------------------------------------------------------------|--------------------------|----------------|-----------------|----------------|-----------------|----------------|-----------------|----------------|
|                                                                | FC <sup>b</sup>          | R <sup>c</sup> | FC <sup>b</sup> | R <sup>c</sup> | FC <sup>b</sup> | R <sup>c</sup> | FC <sup>b</sup> | R <sup>c</sup> |
| <i>E. coli</i> W3110                                           | 1                        | –              | 1               | –              | 1               | –              | 1               | –              |
| <i>E. coli</i> W3110 $\Delta$ <i>grxA</i>                      | 3.20                     | UP             | 6.29            | UP             | 2.28            | UP             | 5.05            | UP             |
| <i>E. coli</i> W3110 $\Delta$ <i>cydD</i>                      | 1.55                     | UP             | 2.69            | UP             | 2.97            | UP             | 3.12            | UP             |
| <i>E. coli</i> W3110 $\Delta$ <i>cpxR</i>                      | 0.72                     | Down           | 0.71            | Down           | 0.63            | Down           | 0.71            | Down           |
| <i>E. coli</i> W3110 $\Delta$ <i>cydD</i> $\Delta$ <i>cpxR</i> | 0.56                     | Down           | 0.51            | Down           | 0.31            | Down           | 0.37            | Down           |

41 X<sup>a</sup> means the Different gene names; FC<sup>b</sup> means the fold change of gene expression ( $2^{-\Delta\Delta C_t}$ )  
 42  $\Delta\Delta C_t$ ) which normalized by the *E. coli* W3110; R<sup>c</sup> means the regulation of gene expression  
 43 which was up-regulated or down-regulated.

44

45 **TABLE S7** The Relative concentration levels of TMP accumulated within different *E.*  
 46 *coli* strains.

| Strains                                          | TMP (ng/ml/OD <sub>600</sub> ) |
|--------------------------------------------------|--------------------------------|
| <i>E. coli</i> W3110                             | 7.48 ± 0.19 (1.0)              |
| <i>E. coli</i> W3110 Δ <i>cydD</i>               | 4.87 ± 0.17 (0.65)             |
| <i>E. coli</i> W3110 Δ <i>cydD</i> Δ <i>acrA</i> | 8.09 ± 0.03 (1.08)             |
| <i>E. coli</i> W3110 Δ <i>cydD</i> Δ <i>tolC</i> | 8.22 ± 0.25 (1.10)             |
| <i>E. coli</i> W3110 Δ <i>acrA</i>               | 8.93 ± 0.05 (1.19)             |
| <i>E. coli</i> W3110 Δ <i>acrB</i>               | 9.06 ± 0.30 (1.21)             |
| <i>E. coli</i> W3110 Δ <i>tolC</i>               | 9.02 ± 0.06 (1.21)             |

47 Data are presented the mean ± SD and set as the ratio between the values in mutants and wild-  
 48 type strain in parentheses.

49

50

51 **TABLE S8** LC-MS/MS parameters of individual TMP

| Compound | Q1 (m/z) | Q3 (m/z) | DP (V) | EP (V) | CE (ev) | CXP (V) |
|----------|----------|----------|--------|--------|---------|---------|
| TMP      | 291.000  | 261.000  | 110.0  | 4.5    | 32.0    | 12.0    |
|          | 291.000  | 123.000  | 110.0  | 4.5    | 32.0    | 9.0     |

52

53

54

55 **TABLE S9** Plasmids, strains and primers used in this study.

| Category       | Name                                       | Relevant Features/Sequences                                                        | Source     |
|----------------|--------------------------------------------|------------------------------------------------------------------------------------|------------|
| <b>Strains</b> |                                            |                                                                                    |            |
|                | <i>E. coli</i> W3110                       |                                                                                    | Lab stock  |
|                | <i>E. coli</i> W3110 $\Delta X$            | <i>X</i> gene was deleted in <i>E. coli</i> W3110                                  | This study |
|                | <i>E. coli</i> W3110 $\Delta cydD\Delta X$ | <i>X</i> gene was deleted in <i>E. coli</i> W3110 $\Delta cydD$                    | This study |
|                | <i>E. coli</i> W3110 $\Delta grxA\Delta X$ | <i>X</i> gene was deleted in <i>E. coli</i> W3110 $\Delta grxA$                    | This study |
|                | <i>E. coli</i> W3110 $\Delta gshA\Delta X$ | <i>X</i> gene was deleted in <i>E. coli</i> W3110 $\Delta gshA$                    | This study |
|                | <i>E. coli</i> W3110 $\Delta gshB\Delta X$ | <i>X</i> gene was deleted in <i>E. coli</i> W3110 $\Delta gshB$                    | This study |
|                | <i>E. coli</i> BW25113                     |                                                                                    | Lab stock  |
|                | <i>E. coli</i> BW25113 $\Delta X$          | <i>X</i> gene was deleted in <i>E. coli</i> BW25113                                | This study |
|                | <i>E. coli</i> MG1655                      |                                                                                    | Lab stock  |
|                | <i>E. coli</i> MG1655 $\Delta X$           | <i>X</i> gene was deleted in <i>E. coli</i> MG1655                                 | This study |
| <b>Primers</b> |                                            |                                                                                    |            |
|                | gshA ko-F                                  | 5-<br>TTGATCCCGGACGTATCACAGGCGCTGGCCTGGCTGGAAAAACA<br>TCCTCAATATGAATATCCTCCTTAG-3  | This study |
|                | gshA ko-R                                  | 5-<br>TCAGGCGTGTTTTTCAGCCACACCGCAAACGGTTCGGTATCAGC<br>GGCTTGTAGGCTGGAGCTGCTTCG-3   | This study |
|                | gshB ko-F                                  | 5-<br>ATGATCAAGCTCGGCATCGTGATGGACCCATCGCAAACATCAA<br>CATCAAATATGAATATCCTCCTTAG-3   | This study |
|                | gshB ko-R                                  | 5-<br>TACTGCTGCTGTAAACGTGCTTCGATGGCATCCATTAACATTCC<br>GGTGATGTAGGCTGGAGCTGCTTCG-3  | This study |
|                | grxA ko-F                                  | 5-<br>ATGCAAACCGTTATTTTGGTCGTTTCGGGTTGCCCTTACTGTGTGC<br>GTGCATATGAATATCCTCCTTAG-3  | This study |
|                | grxA ko-R                                  | 5-<br>TCAGGCGTCCAGATTTTCTTTCACCCATGCAGCAAAATCGGTATA<br>GCCGCTGTAGGCTGGAGCTGCTTCG-3 | This study |
|                | cydD ko-F                                  | 5-<br>ATGAATAAATCTCGTCAAAAAGAGTTAACCCGCTGGTTAAAAACA<br>GCAAAGATATGAATATCCTCCTTAG-3 | This study |
|                | cydD ko-R                                  | 5-<br>TAAATCTCCTCTGACGATGGGCCAGTAATGTGGCGAATGGGCC<br>ACCAGTGTAGGCTGGAGCTGCTTCG-3   | This study |
|                | gsiA ko-F                                  | 5-<br>TTGCCACACAGTGATGAACTTGATGCCGGTAATGTGCTGGCGGTT<br>GAAAAATATGAATATCCTCCTTAG-3  | This study |
|                | gsiA ko-R                                  | 5-<br>TTATCTACGCATGAATGCGTATTCTGATTGTGGTTGTGCGACGTA<br>ATGCCTGTAGGCTGGAGCTGCTTCG-3 | This study |
|                | gsiB ko-F                                  | 5-<br>ATGGCAAGAGCTGTACACCGTAGTGGGTTAGTGGCGCTGGGCAT<br>TGCGACATATGAATATCCTCCTTAG-3  | This study |
|                | gsiB ko-R                                  | 5-<br>TTATTGCAAATCCGCGTCTTCAAAGCTGAAGCCGGTGTCTGGCAT<br>GATCCTGTAGGCTGGAGCTGCTTCG-3 | This study |
|                | gsiAB ko-F                                 | 5-<br>TTGCCACACAGTGATGAACTTGATGCCGGTAATGTGCTGGCGGTT<br>GAAAAATATGAATATCCTCCTTAG-3  | This study |
|                | gsiAB ko-R                                 | 5-<br>TTATTGCAAATCCGCGTCTTCAAAGCTGAAGCCGGTGTCTGGCAT<br>GATCCTGTAGGCTGGAGCTGCTTCG-3 | This study |
|                | gsiC ko-F                                  | 5-<br>ATGCTTAATTACGTTATCAAACGCTTACTGGGGTTGATTCCGACG<br>CTGTTATATGAATATCCTCCTTAG-3  | This study |
|                | gsiC ko-R                                  | 5-<br>TTACTTGTACCTGATAGCCGGGTTAATGGCGGCGTAAAGCACATC<br>CACCATGTAGGCTGGAGCTGCTTCG-3 | This study |
|                | gsiD ko-F                                  | 5-<br>ATGCGACTATTTAACTGGCGACGTCAGGCGGTGTTAAACGCCATG<br>CCTACTATATGAATATCCTCCTTAG-3 | This study |
|                | gsiD ko-R                                  | 5-<br>CTATCCTTTAATTTTCGGATCCAGCGCATCGCGTAAACCATCGCC<br>CAACATGTAGGCTGGAGCTGCTTCG-3 | This study |

|           |                                                                                      |            |
|-----------|--------------------------------------------------------------------------------------|------------|
| ggt ko-F  | 5-<br>ATGATAAAACCGACGTTTTACGCCGGGTGGCCATTGCTGCTCTG<br>CTCTCATATGAATATCCTCCTTAG-3     | This study |
| ggt ko-R  | 5-<br>TTAGTACCCCGCCGTTAAATCATCCACCGAGCGCGGGTCGGATGCT<br>GCCGTTGTAGGCTGGAGCTGCTTCG-3  | This study |
| acrA ko-F | 5-<br>ATGAACAAAAACAGAGGGTTTACGCCTCTGGCGGTCTGTTCTGAT<br>GCTCTCATATGAATATCCTCCTTAG-3   | This study |
| acrA ko-R | 5-<br>TTAAGACTTGGACTGTTTACGGCTGAGCACCGCTTGGCGGCTTGCTG<br>GTTATTGTAGGCTGGAGCTGCTTCG-3 | This study |
| acrB ko-F | 5-<br>ATGCCTAATTTCTTTATCGATCGCCCATTGCGTGGGTGATCG<br>CCATATATGAATATCCTCCTTAG-3        | This study |
| acrB ko-R | 5-<br>TCAATGATGATCGACAGTATGGCTGTGCTCGATATCTTCATTCTT<br>GCGGCTGTAGGCTGGAGCTGCTTCG-3   | This study |
| tolC ko-F | 5-<br>ATGAAGAAATTGCTCCCCATTCTTATCGGCCTGAGCCTTTCTGGG<br>TTCAGATATGAATATCCTCCTTAG-3    | This study |
| tolC ko-R | 5-<br>TCAGTTACGGAAGGGTTATGACCGTTACTGGTGGTAGTGCCTGCT<br>GGATGTGTAGGCTGGAGCTGCTTCG-3   | This study |
| cpxA ko-F | 5-<br>ATGATAGGCAGCTTAACCGCGCGCATCTTCGCCATCTTCTGGCTG<br>ACGCTATATGAATATCCTCCTTAG-3    | This study |
| cpxA ko-R | 5-<br>TTAACTCCGCTTATACAGCGGCAACCAAATCACCAGCCGTAAACCT<br>GCCCATGTAGGCTGGAGCTGCTTCG-3  | This study |
| cpXR ko-F | 5-<br>ATGAATAAAATCCTGTTAGTTGATGATGACCGAGAGCTGACTTCC<br>CTATTATATGAATATCCTCCTTAG-3    | This study |
| cpXR ko-R | 5-<br>TCATGAAGCAGAAACCATCAGATAGCCGCGACCACGCAAGGTTT<br>TAAACCTGTAGGCTGGAGCTGCTTCG-3   | This study |
| soxS ko-F | 5-<br>ATGTCCCATCAGAAAATTATTCAGGATCTTATCGCATGGATTGAC<br>GAGCAATATGAATATCCTCCTTAG-3    | This study |
| soxS ko-R | 5-<br>TTACAGGCGGTGGCGATAATCGCTGGGAGTGGCGATCAAACCTGCC<br>GACGGATGTAGGCTGGAGCTGCTTCG-3 | This study |
| gshA d-F  | 5-CTATGGTGCAGTCACGCTATTA-3                                                           | This study |
| gshA d-R  | 5-GGCATCACTTCTTTGTTCCGGCA-3                                                          | This study |
| gshB d-F  | 5-ATGAAGGACTGAAACTGAATCT-3                                                           | This study |
| gshB d-R  | 5-CCAGAATCCCTTCAATTTTGGAG-3                                                          | This study |
| grxA d-F  | 5-ATGGCTCAGGCAGCGACAGGGA-3                                                           | This study |
| grxA d-R  | 5-GCTTGCTATTTTTCATTCTTCC-3                                                           | This study |
| cydD d-F  | 5-AGTCCGGTATTCATGGTAATGC-3                                                           | This study |
| cydD d-R  | 5-ACTTACCAGACGTTCAAAATAG-3                                                           | This study |
| gsiA d-F  | 5-GGCACGGGCGAAGTCTTCATCC-3                                                           | This study |
| gsiA d-R  | 5-TTATCCAGACCGAACAGCCCT-3                                                            | This study |
| gsiB d-F  | 5-GATGTATCTCGGGCAAATTGTT-3                                                           | This study |
| gsiB d-R  | 5-GCTGGCAATCTCATCGGCAACC-3                                                           | This study |
| gsiAB d-F | 5-CTGCGAGCGGGTAGTAATGGAA-3                                                           | This study |
| gsiAB d-R | 5-GCTGCTGACGCACCAGTTCTAT-3                                                           | This study |
| gsiC d-F  | 5-ACTTCTGGCTCAGGCACTGAA-3                                                            | This study |
| gsiC d-R  | 5-AAAATGTCACGCCCCAGTGAAT-3                                                           | This study |
| gsiD d-F  | 5-GAGGGCGAAAGGGGTGAGCGAA-3                                                           | This study |
| gsiD d-R  | 5-GTTAATGATGAAAAAAGACCA-3                                                            | This study |
| ggt d-F   | 5-AGTGCCGTAAGAATCAGAAGTCG-3                                                          | This study |
| ggt d-R   | 5-CCGCTGGAAGAATATCTACAGGAT-3                                                         | This study |
| acrA d-F  | 5-GCCCAGCGAGGTGGATGATACCCCC-3                                                        | This study |
| acrA d-R  | 5-GGTACCCGTGGAGTCACTGTAGAG-3                                                         | This study |
| acrB d-F  | 5-GCGGATGACAAAGTGAAACCC-3                                                            | This study |
| acrB d-R  | 5-GGTGACACTAATACCAGGATTGCTC-3                                                        | This study |
| tolC d-F  | 5-ATGTAACGGGCAGGTTGTCTGG-3                                                           | This study |
| tolC d-R  | 5-CGATGCGTGGCGTATGGATTT-3                                                            | This study |
| cpxA d-F  | 5-GCATCTGGGTGAGGTTTCC-3                                                              | This study |
| cpxA d-R  | 5-TGACGATCAATATCACCGTTACTCT-3                                                        | This study |



|           |                               |            |
|-----------|-------------------------------|------------|
| cpxR d-F  | 5-TCGAACATATGGCTCTGCGTACTGC-3 | This study |
| cpxR d-R  | 5-CTGTCCTGGCGGTGCCCACTTATCA-3 | This study |
| soxS d-F  | 5-GTCGCCAGCGGAATGCCAATAC-3    | This study |
| soxS d-R  | 5-AACCTTAAATCATTGAATGTCG-3    | This study |
| gapA-RT-F | 5-ACTGACTGGTATGGCGTTCC-3      | This study |
| gapA-RT-R | 5-GCAGCTTTTCCAGACGAAC-3       | This study |
| acrA-RT-F | 5-TGGCGCGGATGACAAAG-3         | This study |
| acrA-RT-R | 5-CCAATAGCCTGGCTTGCAA-3       | This study |
| acrB-RT-F | 5-TGGTGACCGCAACGGTACT-3       | This study |
| acrB-RT-R | 5-GGCGAACCACCACAAAGAAT-3      | This study |
| tolC-RT-F | 5-AAAACGTTGCACCGCAAAC-3       | This study |
| tolC-RT-R | 5-GGCGCATAACCATCAGCAAT-3      | This study |
| soxS-RT-F | 5-GGTGACGCATCAGACGCTTGG-3     | This study |
| soxS-RT-R | 5-CGAGACATAACCCAGGTCCATTGC-3  | This study |

56

57

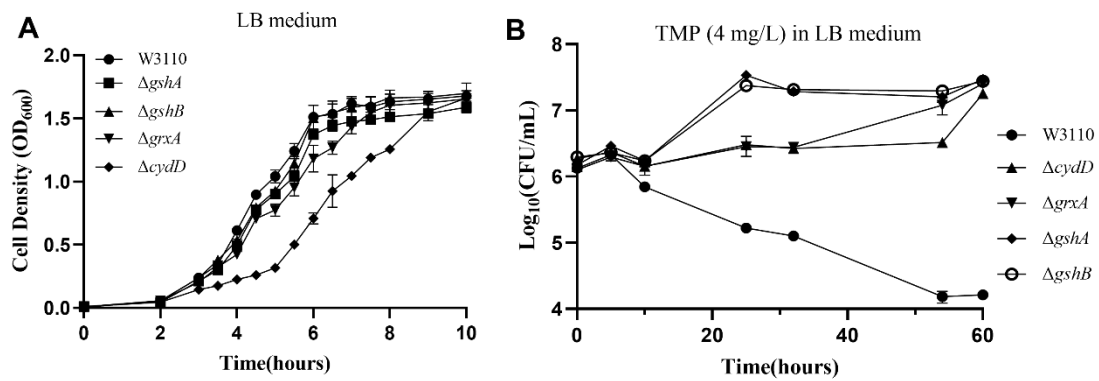

58

59 **FIG. S1** Growth curves (A) and time-kill curves (B) of different *E. coli* strains in LB  
 60 medium. Data represent mean  $\pm$  standard deviation (SD) of the results from three  
 61 independent experiments.
